# Supplementary material
Source: HighWire-hosted journal article supplement (https://bjsm.bmj.com/content/53/9/554)
Supplement: inline-supplementary-material-4 [file inline-supplementary-material-4.docx]

**Appendix D.** Conflict of interest of included studies.

| First Author | Conflict of interest |
| --- | --- |
| Akbari et al. | No conflict of interest |
| Alschuler et al. | No conflict of interest |
| Altuğ et al. | No conflict of interest |
| Areeudomwong and Buttagat | No conflict of interest |
| Askary-Ashtiani et al. | Not reported |
| Boersma et al. | Not reported |
| Bränström et al. | Not reported |
| Carvalho et al. | Not reported |
| Damsgard et al. | Not reported |
| Demirbüken et al. | Not reported |
| Dimitriadis et al. | No conflict of interest |
| Domenech et al. | No conflict of interest |
| Elfving et al. | Not reported |
| Er and Angln | No conflict of interest |
| Falla et al. | No conflict of interest |
| Ferrari et al. | Not reported |
| Franklin et al. | Not reported |
| French et al. | Not reported |
| George et al. | Not reported |
| Helminen et al. | No conflict of interest |
| Heuts et al. | Not reported |
| Van Den Houte et al. | No conflict of interest |
| Howell et al. | No conflict of interest |
| Huijnen et al. | Not reported |
| Huis et al. | Not reported |
| Johansen et al. | No conflict of interest |
| Koho et al. | Not reported |
| Lambin et al. | No conflict of interest |
| Lamoth et al. | Not reported |
| Larsson et al. | No conflict of interest |
| Lewis et al. | Not reported |
| Lopez-de-Uralde-Villanueva et al. | No conflict of interest |
| Lundberg et al. | Not reported |
| Lüning Bergsten et al. | No conflict of interest |
| Matos et al. | No conflict of interest |
| Meeus et al. | No conflict of interest |
| de Moraes Vieira et al. | Not reported |
| Nijs et al. | No conflict of interest |
| Nijs et al. b | Not reported |
| Nijs and Thielemans c | Not reported |
| Orenius et al. | No conflict of interest |
| Oskay et al. | Not reported |
| Picavet et al. | Not reported |
| Roelofs et al. | Not reported |
| Roelofs et al. b | Not reported |
| Russek et al. | Not reported |
| Rusu et al. | No conflict of interest |
| Saavedra-Hernandez et al. | No conflict of interest |
| Schiphorst Preuper et al. | Not reported |
| Sinikallio et al. | No conflict of interest |
| Sullivan et al. | No conflict of interest |
| Thibault et al. | No conflict of interest |
| Thomas et al. | Not reported |
| Thompson et al. | Not reported |
| Turk et al. | Not reported |
| Vernon et al. | Not reported |
| Vernon et al. b | No conflict of interest |
| Vernon et al. c | No conflict of interest |
| Vincent et al. | No conflict of interest |
| Vlaeyen et al. | Not reported |
| Vlaeyen et al. b | Not reported |
| Woby et al. | Not reported |
| Wong et al. | This study conformed to the Helsinki Declaration concerning human rights and informed consent, and it also followed correct procedures concerning treatment of humans and animals in research. |
