# Supplementary material
Source: HighWire-hosted journal article supplement (https://bjsm.bmj.com/content/53/9/554)
Supplement: inline-supplementary-material-6 [file inline-supplementary-material-6.docx]

**Figure 1.** Preferred Reporting Items for Systematic reviews and Meta-Analyses flow diagram of the conducted search.

Full-text articles excluded, with reasons
(n =282)

Ineligible if:

1. Not observational design (61)

2. Not chronic musculoskeletal pain (58)

3. Not association between kinesiophobia and pain intensity, pain severity, disability, and/or quality of life (40)

4. Studies testing kinesiophobia in the context of a behavioral task or treatment (60)

5. Kinesiophobia examined in CMP after fracture (4)

6. Kinesiophobia measured before surgery and or post-surgery (45)

8. Kinesiophobia did not measure with TSK (14)

Records excluded by title and abstract
(n =299)

Records identified through database searching
(n =1757)

PubMed n=794

CINAHL n=280

PsycINFO n=393

PubPsych n=216

AMED n=74

**Screening**

**Included**

**Eligibility**

**Identification**

Additional records identified through other sources
(n =148)

Records after duplicates removed
(n =644)

Records screened
(n =644)

Full-text articles assessed for eligibility
(n =345)

Studies included in quantitative synthesis
(n =63)
