# Supplementary material
Source: HighWire-hosted journal article supplement (https://bjsm.bmj.com/content/53/9/554)
Supplement: inline-supplementary-material-7 [file inline-supplementary-material-7.docx]

**Appendix F.** Assessment of risk of bias of included studies through the NOS.

| First Author | Selection bias | Performance bias | | Detection bias | | Information bias | | Total score |
| --- | --- | --- | --- | --- | --- | --- | --- | --- |
| A | B | C | D | E | F | G |  |
| Akbari et al. | 1 | 0 | 2 | 2 | 3 | 3 | 2 | 13/21 |
| Alschuler et al. | 2 | 0 | 3 | 2 | 3 | 3 | 3 | 16/21 |
| Altuğ et al. | 0 | 0 | 0 | 0 | 3 | 3 | 2 | 8/21 |
| Areeudomwong and Buttagat | 1 | 0 | 0 | 2 | 3 | 3 | 2 | 11/21 |
| Askary-Ashtiani et al. | 1 | 0 | 0 | 2 | 3 | 2 | 2 | 10/21 |
| Boersma et al. | 0 | 0 | 2 | 0 | 0 | 3 | 2 | 7/21 |
| Bränström et al. | 1 | 0 | 1 | 1 | 1 | 3 | 2 | 9/21 |
| Carvalho et al. | 0 | 0 | 3 | 2 | 3 | 2 | 2 | 12/21 |
| Damsgard et al. | 1 | 0 | 3 | 2 | 1 | 3 | 2 | 12/21 |
| Demirbüken et al. | 1 | 0 | 0 | 0 | 3 | 3 | 2 | 9/21 |
| Dimitriadis et al. | 0 | 0 | 0 | 0 | 3 | 2 | 2 | 7/21 |
| Domenech et al. | 1 | 0 | 1 | 1 | 3 | 3 | 2 | 11/21 |
| Elfving et al. | 1 | 0 | 0 | 1 | 0 | 3 | 2 | 7/21 |
| Er and Angln | 1 | 0 | 0 | 1 | 3 | 2 | 2 | 9/21 |
| Falla et al. | 1 | 0 | 2 | 2 | 3 | 3 | 3 | 14/21 |
| Ferrari et al. | 1 | 0 | 1 | 2 | 3 | 3 | 2 | 12/21 |
| Franklin et al. | 1 | 0 | 2 | 2 | 3 | 3 | 2 | 13/21 |
| French et al. | 1 | 0 | 0 | 2 | 3 | 3 | 2 | 11/21 |
| George et al. | 2 | 2 | 1 | 2 | 3 | 3 | 2 | 15/21 |
| Helminen et al. | 0 | 0 | 3 | 2 | 3 | 3 | 2 | 13/21 |
| Heuts et al. | 1 | 0 | 3 | 2 | 0 | 3 | 2 | 11/21 |
| Van den Houte et al. | 1 | 0 | 2 | 2 | 2 | 3 | 2 | 12/21 |
| Howell et al. | 1 | 0 | 3 | 2 | 3 | 3 | 2 | 14/21 |
| Huijnen et al. | 1 | 0 | 0 | 1 | 0 | 2 | 2 | 6/21 |
| Huis et al. | 0 | 0 | 0 | 2 | 0 | 2 | 2 | 6/21 |
| Johansen et al. | 1 | 0 | 2 | 2 | 0 | 3 | 2 | 10/21 |
| Koho et al. | 1 | 0 | 0 | 0 | 3 | 3 | 2 | 9/21 |
| Lambin et al. | 0 | 0 | 0 | 1 | 3 | 3 | 2 | 9/21 |
| Lamoth et al. | 0 | 0 | 0 | 2 | 0 | 1 | 2 | 5/21 |
| Larsson et al. | 0 | 0 | 2 | 2 | 3 | 3 | 2 | 12/21 |
| Lewis et al. | 1 | 0 | 1 | 1 | 0 | 3 | 2 | 8/21 |
| López-de-Uralde-Villanueva et al. | 1 | 3 | 2 | 2 | 3 | 3 | 2 | 16/21 |
| Lundberg et al. | 1 | 0 | 2 | 1 | 3 | 3 | 2 | 12/21 |
| Lüning Bergsten et al. | 1 | 0 | 1 | 1 | 0 | 3 | 2 | 8/21 |
| Matos et al. | 1 | 0 | 2 | 3 | 3 | 3 | 2 | 14/21 |
| Meeus et al. | 1 | 0 | 2 | 2 | 3 | 3 | 2 | 13/21 |
| de Moraes Vieira et al. | 1 | 0 | 3 | 2 | 3 | 3 | 2 | 14/21 |
| Nijs et al. | 1 | 0 | 0 | 2 | 3 | 3 | 2 | 11/21 |
| Nijs et al. b | 1 | 0 | 0 | 2 | 0 | 3 | 2 | 8/21 |
| Nijs and Thielemans c | 1 | 0 | 0 | 1 | 3 | 3 | 2 | 10/21 |
| Orenius et al. | 1 | 0 | 0 | 1 | 0 | 3 | 2 | 7/21 |
| Oskay et al. | 1 | 0 | 0 | 1 | 3 | 3 | 2 | 10/21 |
| Picavet et al. | 3 | 0 | 1 | 0 | 0 | 3 | 2 | 9/21 |
| Roelofs et al. | 1 | 0 | 0 | 2 | 3 | 2 | 2 | 10/21 |
| Roelofs et al. b | 1 | 0 | 1 | 2 | 3 | 2 | 2 | 11/21 |
| Russek et al. | 0 | 0 | 2 | 2 | 2 | 2 | 2 | 10/21 |
| Rusu et al. | 1 | 0 | 0 | 2 | 3 | 2 | 2 | 10/21 |
| Saavedra-Hernández et al. | 1 | 0 | 2 | 2 | 3 | 3 | 2 | 13/21 |
| Schiphorst Preuper et al. | 1 | 0 | 2 | 2 | 3 | 3 | 2 | 13/21 |
| Sinikallio et al. | 1 | 0 | 2 | 2 | 3 | 2 | 3 | 13/21 |
| Sullivan et al. | 0 | 0 | 1 | 1 | 3 | 3 | 2 | 10/21 |
| Thibault et al. | 1 | 0 | 2 | 0 | 3 | 1 | 2 | 9/21 |
| Thomas et al. | 1 | 0 | 0 | 1 | 3 | 2 | 2 | 9/21 |
| Thompson et al. | 1 | 0 | 2 | 2 | 3 | 3 | 2 | 13/21 |
| Turk et al. | 1 | 0 | 1 | 0 | 3 | 3 | 2 | 10/21 |
| Vernon et al. | 2 | 0 | 2 | 2 | 3 | 3 | 3 | 15/21 |
| Vernon et al. b | 2 | 0 | 2 | 2 | 3 | 3 | 2 | 14/21 |
| Vernon et al. c | 2 | 0 | 2 | 3 | 0 | 3 | 2 | 12/21 |
| Vincent et al. | 1 | 0 | 2 | 2 | 3 | 3 | 2 | 13/21 |
| Vlaeyen et al. | 1 | 0 | 2 | 2 | 3 | 3 | 2 | 13/21 |
| Vlaeyen et al. b | 1 | 0 | 0 | 2 | 3 | 3 | 2 | 11/21 |
| Woby et al. | 1 | 0 | 2 | 2 | 3 | 2 | 2 | 12/21 |
| Wong et al. | 1 | 0 | 3 | 2 | 0 | 3 | 2 | 11/21 |

Note: the Newcastle-Ottawa Quality Assessment Scale: adapted version: A = Is the source population (cases, controls, cohorts) appropriate and representative of the population of interest?; B = Is the sample size adequate and is there sufficient power to detect a meaningful difference in the outcome of interest?; C = Did the study identify and adjust for any variables or confounders that may influence the outcome?; D = Did the study use appropriate statistical analysis methods relative to the outcome of interest?; E = Is there little missing data and did the study handle it accordingly?; F = Is the methodology of the outcome measurement explicitly stated and is it appropriate?; G = Is there an objective assessment of the outcome of interest?.
