# Supplementary material
Source: HighWire-hosted journal article supplement (https://bjsm.bmj.com/content/53/9/554)
Supplement: inline-supplementary-material-9 [file inline-supplementary-material-9.docx]

**Appendix H.** Summary of the statistical results about the predictive value of kinesiophobia on pain, disability, and/or quality of life (longitudinal analysis).

| THE PREDICTIVE VALUE OF KINESIOPHOBIA ON PAIN, DISABILITY, AND QUALITY OF LIFE IN CHRONIC MUSCULOSKELETAL PAIN | | | | |
| --- | --- | --- | --- | --- |
| First Author | Pain intensity | Pain severity | Disability | Quality of life |
| Helminen et al. | Baseline kinesiophobia- pain intensity at twelve months: B[95%CI]= -5.04[-11.39 to 1.31] | **-** | **Baseline kinesiophobia-disability at twelve months: WOMAC function (B[95%CI]= -7.09[-14.07 to -0.11] p ⩽ 0.05); RAND-36 function (B[95%CI]= 8.69[1.16 to 16.22] p⩽ 0.05)** | - |
| Van Den Houte et al. | - | Data not reported | **Kinesiophobia at baseline -disability after intervention r= 0.17 p<0.001; kinesiophobia after intervention-disability at three months r= 0.17 p<0.001** | - |
| [Koho](https://www.ncbi.nlm.nih.gov/pubmed/?term=S%C3%B6derlund%20A%5BAuthor%5D&cauthor=true&cauthor_uid=17650736) et al. | Kinesiophobia at baseline-pain intensity at baseline: high kinesiophobia 68(21); medium kinesiophobia 65(26); low kinesiophobia 60(22) p=0.17.  Kinesiophobia at baseline-pain intensity at 12 months: high kinesiophobia -14[95%CI -25 to -4]; medium kinesiophobia -11 [95%CI -19 to -2]; low kinesiophobia -7 [95%CI -17 to 3] p= 0.33 | - | Kinesiophobia at baseline-disability at baseline: high kinesiophobia 39(14); medium kinesiophobia 37(9); low kinesiophobia 31(11) p=0.004.  Kinesiophobia at baseline-disability at 12 months: high kinesiophobia [95%CI]= -6 [-11 to -1]; medium kinesiophobia [95%CI]= -4 [-8 to 0]; low kinesiophobia [95%CI]= -4 [-9 to 1] p=0.58 | - |
| Lüning Bergsten et al. | - | **-** | **Kinesiophobia at baseline-disability at baseline r= 0.311 p<0.01; changes in kinesiophobia after intervention-changes in disability after intervention r= 0.227 p<0.01**; changes in kinesiophobia at 6 months after intervention-changes in disability at six months (not reported) | **-** |
| Matos et al. | - | - | Baseline kinesiophobia-disability at three months: B[95%CI]= 1.384[0.6008 to 2.160] p=0.000; data at Follow-up not reported | **-** |
| Orenius et al. | - | - | - | Baseline kinesiophobia-quality of life at twelve months: OR= 1.0 (data for changes in kinesiophobia at 12 months and changes of quality of life at 12 months are not reported) |
| Picavet et al. | - | **-** | **Baseline kinesiophobia-disability at six months: Lowest tertiles OR=1; middle tertiles OR[95%CI]= 0.8[0.5 to 1.4]; highest tertiles OR[95%CI]= 1.7[1.0 to 2.9]** | **-** |
| Wong et al. | - | **Baseline kinesiophobia-pain severity at six months: B= 0.19 p<0.001** | **Baseline kinesiophobia-disability at six months: B= 0.19 p<0.001** | **Baseline kinesiophobia-quality of life at six months: QOL physical B[95%CI]= -0.18[-0.29 to -0.07] SE= 0.06 p<0.01**; QOL mental B[95%CI]= 0.10[-0.02 to 0.21] SE=0.06 |

*****Significant results are showed in bold.
